# Supplementary material for: Mimicry between adult rove beetles and assassin bug nymphs with unequal defenses: antagonistic or mutualistic?
Source: PeerJ. 2025 Sep 9;13:e19942. doi: 10.7717/peerj.19942 (PMC12428538; doi:10.7717/peerj.19942)
Supplement: Supplemental Information 3 [file peerj-13-19942-s003.xlsx]

## Sheet: Experiment_I_A
Code	Date	Time	Prey_species	Prey_code	Prey_code_number	Sex	Order	Prey_length_mm	Prey_weight_mg	Predator_species	Predator_code	Predator_code_number	Predator_SVL_mm	Predator_weight_mg	Result
32	2022-08-10	01:28:00	Paederus_fuscipes	Paederus_fuscipes_2022_8-10-1	1	Female	First	8.16	4.5	Pelophylax_nigromaculatus	Pn_2022_80	117	24.26	915.1	Eat
34	2022-08-10	01:41:00	Paederus_fuscipes	Paederus_fuscipes_2022_8-10-2	3	Male	First	7.32	2.7	Pelophylax_nigromaculatus	Pn_2022_81	118	39.18	4796.2	Eat
36	2022-08-10	01:58:00	Paederus_fuscipes	Paederus_fuscipes_2022_8-10-3	4	Female	First	7.87	5.1	Pelophylax_nigromaculatus	Pn_2022_82	119	22.88	987.2	Eat
38	2022-08-10	02:11:00	Paederus_fuscipes	Paederus_fuscipes_2022_8-10-4	5	Female	First	7.91	4.9	Pelophylax_nigromaculatus	Pn_2022_83	120	24.76	1047.9	Eat
40	2022-08-10	02:27:00	Paederus_fuscipes	Paederus_fuscipes_2022_8-10-5	6	Male	First	7.14	2.8	Pelophylax_nigromaculatus	Pn_2022_84	121	33.39	2388.8	Eat
42	2022-08-10	02:41:00	Paederus_fuscipes	Paederus_fuscipes_2022_8-10-6	7	Male	First	7.96	3.3	Pelophylax_nigromaculatus	Pn_2022_85	122	22.98	702.9	Stop_attack
44	2022-08-10	02:56:00	Paederus_fuscipes	Paederus_fuscipes_2022_8-10-7	8	Male	First	8.1	4.1	Pelophylax_nigromaculatus	Pn_2022_86	123	25.11	1336.5	Eat
46	2022-08-10	03:12:00	Paederus_fuscipes	Paederus_fuscipes_2022_8-10-8	9	Male	First	8.29	3.8	Pelophylax_nigromaculatus	Pn_2022_66	104	30.93	2421.8	Ignore
48	2022-08-10	03:31:00	Paederus_fuscipes	Paederus_fuscipes_2022_8-10-9	10	Female	First	8.17	4.6	Pelophylax_nigromaculatus	Pn_2022_87	124	20.71	704.6	Stop_attack
50	2022-08-10	04:05:00	Paederus_fuscipes	Paederus_fuscipes_2022_8-10-10	2	Male	First	7.74	3.7	Pelophylax_nigromaculatus	Pn_2022_88	125	34.58	3015.1	Eat
52	2022-08-18	22:07:00	Paederus_fuscipes	Paederus_fuscipes_2022_8-18-1	11	Male	First	7.06	2.8	Pelophylax_nigromaculatus	Pn_2022_89	126	25.65	1489	Stop_attack
54	2022-08-18	22:23:00	Paederus_fuscipes	Paederus_fuscipes_2022_8-18-2	12	Male	First	8.08	2.4	Pelophylax_nigromaculatus	Pn_2022_90	127	23.79	1012.8	Eat
56	2023-07-24	03:04:00	Paederus_fuscipes	Paederus_fuscipes_2023_1	15	Male	First	7.7	3	Pelophylax_nigromaculatus	Pn_2023_31	129	34.72	2678	Stop_attack
58	2023-07-24	03:30:00	Paederus_fuscipes	Paederus_fuscipes_2023_2	26	Female	First	7.06	2.8	Pelophylax_nigromaculatus	Pn_2023_30	128	33.82	2642.8	Eat
68	2023-08-02	00:04:00	Paederus_fuscipes	Paederus_fuscipes_2023_6	31	Female	First	8.26	4.2	Pelophylax_nigromaculatus	Pn_2023_34	132	35.52	3271.7	Eat
70	2023-08-02	00:15:00	Paederus_fuscipes	Paederus_fuscipes_2023_7	32	Female	First	8.67	4.3	Pelophylax_nigromaculatus	Pn_2023_35	133	35.43	2781.8	Stop_attack
72	2023-08-02	01:33:00	Paederus_fuscipes	Paederus_fuscipes_2023_8	33	Female	First	8.44	4.6	Pelophylax_nigromaculatus	Pn_2023_45	138	33.02	2588.1	Eat
74	2023-08-02	01:50:00	Paederus_fuscipes	Paederus_fuscipes_2023_9	34	Female	First	8.92	4.1	Pelophylax_nigromaculatus	Pn_2023_46	139	30.73	1989.6	Ignore
76	2023-08-02	02:05:00	Paederus_fuscipes	Paederus_fuscipes_2023_10	16	Male	First	8.3	4.3	Pelophylax_nigromaculatus	Pn_2023_42	136	39.06	4629.3	Eat
78	2023-08-02	02:17:00	Paederus_fuscipes	Paederus_fuscipes_2023_11	17	Male	First	7.95	3	Pelophylax_nigromaculatus	Pn_2023_41	135	38.24	3736.2	Ignore
84	2023-08-11	21:40:00	Paederus_fuscipes	Paederus_fuscipes_2023_14	20	Female	First	8.12	4.4	Pelophylax_nigromaculatus	Pn_2023_55	141	32.46	2405.5	Stop_attack
88	2023-08-11	22:24:00	Paederus_fuscipes	Paederus_fuscipes_2023_16	22	Female	First	8.55	5.5	Pelophylax_nigromaculatus	Pn_2023_57	143	39.42	4270.8	Stop_attack
94	2023-08-23	21:01:00	Paederus_fuscipes	Paederus_fuscipes_2023_19	25	Male	First	8.41	3.9	Pelophylax_nigromaculatus	Pn_2023_67	147	38.41	3910.5	Eat
98	2023-08-23	21:30:00	Paederus_fuscipes	Paederus_fuscipes_2023_21	28	Female	First	8.58	4.1	Pelophylax_nigromaculatus	Pn_2023_65	145	41.81	5614.2	Stop_attack

## Sheet: Experiment_I_B
Code	Date	Time	Prey_species	Prey_code	Prey_code_number	Instar	Order	Prey_length_mm	Prey_weight_mg	Predator_species	Predator_code	Predator_code_number	Predator_SVL_mm	Predator_weight_mg	Result
2	2022-08-07	08:08:00	Sirthenea_flavipes	Sirthenea_flavipes_2022_2	59	Second	First	5.78	4.6	Pelophylax_nigromaculatus	Pn_2022_68	105	22.72	1035.5	Stop_attack
4	2022-08-07	08:28:00	Sirthenea_flavipes	Sirthenea_flavipes_2022_3	60	Second	First	5.56	4.3	Pelophylax_nigromaculatus	Pn_2022_69	106	26.47	1312.8	Stop_attack
6	2022-08-07	08:41:00	Sirthenea_flavipes	Sirthenea_flavipes_2022_4	61	Third	First	7.28	9.8	Pelophylax_nigromaculatus	Pn_2022_62	102	33.34	3242.4	Eat
8	2022-08-07	08:55:00	Sirthenea_flavipes	Sirthenea_flavipes_2022_5	62	Second	First	5.52	4	Pelophylax_nigromaculatus	Pn_2022_70	107	33.53	3058.9	Stop_attack
10	2022-08-07	09:11:00	Sirthenea_flavipes	Sirthenea_flavipes_2022_6	63	Second	First	5.23	3	Pelophylax_nigromaculatus	Pn_2022_51	101	27.07	1283.5	Eat
12	2022-08-07	10:06:00	Sirthenea_flavipes	Sirthenea_flavipes_2022_7	64	Third	First	6.87	6.3	Pelophylax_nigromaculatus	Pn_2022_65	103	35.78	3081.6	Eat
14	2022-08-07	10:25:00	Sirthenea_flavipes	Sirthenea_flavipes_2022_8	65	Second	First	5.42	4	Pelophylax_nigromaculatus	Pn_2022_71	108	23.91	1103.3	Stop_attack
16	2022-08-07	10:36:00	Sirthenea_flavipes	Sirthenea_flavipes_2022_9	66	Second	First	5.79	3.9	Pelophylax_nigromaculatus	Pn_2022_72	109	24.25	1128.3	Stop_attack
18	2022-08-07	10:49:00	Sirthenea_flavipes	Sirthenea_flavipes_2022_10	52	Second	First	5.87	3.3	Pelophylax_nigromaculatus	Pn_2022_73	110	31.31	2641.3	Stop_attack
20	2022-08-07	11:01:00	Sirthenea_flavipes	Sirthenea_flavipes_2022_11	53	Second	First	5.07	4	Pelophylax_nigromaculatus	Pn_2022_74	111	37.73	3815.3	Ignore
22	2022-08-07	11:14:00	Sirthenea_flavipes	Sirthenea_flavipes_2022_1	51	Third	First	7.22	9.4	Pelophylax_nigromaculatus	Pn_2022_75	112	25.28	984.4	Eat
24	2022-08-07	11:24:00	Sirthenea_flavipes	Sirthenea_flavipes_2022_12	54	Second	First	5.07	5.8	Pelophylax_nigromaculatus	Pn_2022_76	113	24.29	1038.8	Stop_attack
26	2022-08-07	11:44:00	Sirthenea_flavipes	Sirthenea_flavipes_2022_13	55	Second	First	5.56	3.6	Pelophylax_nigromaculatus	Pn_2022_77	114	30.57	2177.4	Ignore
28	2022-08-07	11:57:00	Sirthenea_flavipes	Sirthenea_flavipes_2022_14	56	Second	First	5.88	4.3	Pelophylax_nigromaculatus	Pn_2022_78	115	36.8	2970.4	Stop_attack
30	2022-08-07	12:11:00	Sirthenea_flavipes	Sirthenea_flavipes_2022_15	57	Second	First	5.97	5.6	Pelophylax_nigromaculatus	Pn_2022_79	116	26.46	1333.8	Stop_attack
60	2023-07-24	03:42:00	Sirthenea_flavipes	Sirthenea_flavipes_L_2023_3	73	Third	First	7.7	12.8	Pelophylax_nigromaculatus	Pn_2023_32	130	28.53	1659.1	Stop_attack
64	2023-08-01	23:20:00	Sirthenea_flavipes	Sirthenea_flavipes_L_2023_5	75	Second	First	8.06	10.7	Pelophylax_nigromaculatus	Pn_2023_44	137	34.82	3518.9	Stop_attack
66	2023-08-01	23:36:00	Sirthenea_flavipes	Sirthenea_flavipes_L_2023_4	74	Second	First	8.09	10.6	Pelophylax_nigromaculatus	Pn_2023_36	134	38.15	4188.8	Eat
80	2023-08-02	02:35:00	Sirthenea_flavipes	Sirthenea_flavipes_L_2023_6	76	Fourth	First	9.52	23.2	Pelophylax_nigromaculatus	Pn_2023_33	131	36.04	3217	Stop_attack
82	2023-08-02	02:51:00	Sirthenea_flavipes	Sirthenea_flavipes_L_2023_7	77	Fourth	First	8.94	25.1	Pelophylax_nigromaculatus	Pn_2023_47	140	35.13	3228.6	Stop_attack
86	2023-08-11	22:09:00	Sirthenea_flavipes	Sirthenea_flavipes_L_2023_9	79	Second	First	7.53	10.6	Pelophylax_nigromaculatus	Pn_2023_56	142	37.4	4003.1	Eat
90	2023-08-11	22:36:00	Sirthenea_flavipes	Sirthenea_flavipes_L_2023_11	69	Second	First	7.04	12.7	Pelophylax_nigromaculatus	Pn_2023_58	144	35.36	3276.1	Stop_attack
92	2023-08-23	20:46:00	Sirthenea_flavipes	Sirthenea_flavipes_L_2023_12	70	Fourth	First	9.92	25.3	Pelophylax_nigromaculatus	Pn_2023_66	146	34.18	3205.7	Eat
96	2023-08-23	21:13:00	Sirthenea_flavipes	Sirthenea_flavipes_L_2023_13	71	Fourth	First	8.65	18.8	Pelophylax_nigromaculatus	Pn_2023_68	148	42	5641.4	Stop_attack

## Sheet: Experiment_II_A
Code	Date	Time	Time_lag	Prey_species	Prey_code	Prey_code_number	Instar/sex	Order	Prey_length_mm	Prey_weight_mg	Predator_species	Predator_code	Predator_code_number	Predator_SVL_mm	Predator_weight_mg	Result	Mealworm_after_experiment
32	2022-08-10	01:28:00		Paederus_fuscipes	Paederus_fuscipes_2022_8-10-1	1	Female	First	8.16	4.5	Pelophylax_nigromaculatus	Pn_2022_80	117	24.26	915.1	Eat	-
33	2022-08-10	01:34:00	00:06:00	Sirthenea_flavipes	Sirthenea_flavipes_2022_2	59	Second	Second	5.8	4.6	Pelophylax_nigromaculatus	Pn_2022_80	117	24.26	915.1	Eat	-
34	2022-08-10	01:41:00		Paederus_fuscipes	Paederus_fuscipes_2022_8-10-2	3	Male	First	7.32	2.7	Pelophylax_nigromaculatus	Pn_2022_81	118	39.18	4796.2	Eat	-
35	2022-08-10	01:47:00	00:06:00	Sirthenea_flavipes	Sirthenea_flavipes_2022_3	60	Second	Second	5.7	5.3	Pelophylax_nigromaculatus	Pn_2022_81	118	39.18	4796.2	Eat	-
36	2022-08-10	01:58:00		Paederus_fuscipes	Paederus_fuscipes_2022_8-10-3	4	Female	First	7.87	5.1	Pelophylax_nigromaculatus	Pn_2022_82	119	22.88	987.2	Eat	-
37	2022-08-10	02:04:00	00:06:00	Sirthenea_flavipes	Sirthenea_flavipes_2022_5	62	Second	Second	5.6	5.4	Pelophylax_nigromaculatus	Pn_2022_82	119	22.88	987.2	Stop_attack	Eat
38	2022-08-10	02:11:00		Paederus_fuscipes	Paederus_fuscipes_2022_8-10-4	5	Female	First	7.91	4.9	Pelophylax_nigromaculatus	Pn_2022_83	120	24.76	1047.9	Eat	-
39	2022-08-10	02:17:00	00:06:00	Sirthenea_flavipes	Sirthenea_flavipes_2022_8	65	Second	Second	6.1	5.2	Pelophylax_nigromaculatus	Pn_2022_83	120	24.76	1047.9	Eat	-
40	2022-08-10	02:27:00		Paederus_fuscipes	Paederus_fuscipes_2022_8-10-5	6	Male	First	7.14	2.8	Pelophylax_nigromaculatus	Pn_2022_84	121	33.39	2388.8	Eat	-
41	2022-08-10	02:33:00	00:06:00	Sirthenea_flavipes	Sirthenea_flavipes_2022_5	62	Second	Second	6.17	5.2	Pelophylax_nigromaculatus	Pn_2022_84	121	33.39	2388.8	Eat	-
42	2022-08-10	02:41:00		Paederus_fuscipes	Paederus_fuscipes_2022_8-10-6	7	Male	First	7.96	3.3	Pelophylax_nigromaculatus	Pn_2022_85	122	22.98	702.9	Stop_attack	-
43	2022-08-10	02:47:00	00:06:00	Sirthenea_flavipes	Sirthenea_flavipes_2022_9	66	Second	Second	5.63	4	Pelophylax_nigromaculatus	Pn_2022_85	122	22.98	702.9	Stop_attack	Eat
44	2022-08-10	02:56:00		Paederus_fuscipes	Paederus_fuscipes_2022_8-10-7	8	Male	First	8.1	4.1	Pelophylax_nigromaculatus	Pn_2022_86	123	25.11	1336.5	Eat	-
45	2022-08-10	03:02:00	00:06:00	Sirthenea_flavipes	Sirthenea_flavipes_2022_10	52	Second	Second	5.41	3.8	Pelophylax_nigromaculatus	Pn_2022_86	123	25.11	1336.5	Stop_attack	Eat
46	2022-08-10	03:12:00		Paederus_fuscipes	Paederus_fuscipes_2022_8-10-8	9	Male	First	8.29	3.8	Pelophylax_nigromaculatus	Pn_2022_66	104	30.93	2421.8	Ignore	-
47	2022-08-10	03:18:00	00:06:00	Sirthenea_flavipes	Sirthenea_flavipes_2022_9	66	Second	Second	5.26	4.1	Pelophylax_nigromaculatus	Pn_2022_66	104	30.93	2421.8	Ignore	Eat
48	2022-08-10	03:31:00		Paederus_fuscipes	Paederus_fuscipes_2022_8-10-9	10	Female	First	8.17	4.6	Pelophylax_nigromaculatus	Pn_2022_87	124	20.71	704.6	Stop_attack	-
49	2022-08-10	03:37:00	00:06:00	Sirthenea_flavipes	Sirthenea_flavipes_2022_10	52	Second	Second	5.49	4	Pelophylax_nigromaculatus	Pn_2022_87	124	20.71	704.6	Ignore	Eat
50	2022-08-10	04:05:00		Paederus_fuscipes	Paederus_fuscipes_2022_8-10-10	2	Male	First	7.74	3.7	Pelophylax_nigromaculatus	Pn_2022_88	125	34.58	3015.1	Eat	-
51	2022-08-10	04:10:00	00:05:00	Sirthenea_flavipes	Sirthenea_flavipes_2022_9	66	Second	Second	5.44	4.2	Pelophylax_nigromaculatus	Pn_2022_88	125	34.58	3015.1	Eat	-
52	2022-08-18	22:07:00		Paederus_fuscipes	Paederus_fuscipes_2022_8-18-1	11	Male	First	7.06	2.8	Pelophylax_nigromaculatus	Pn_2022_89	126	25.65	1489	Stop_attack	-
53	2022-08-18	22:13:00	00:06:00	Sirthenea_flavipes	Sirthenea_flavipes_2022_16	58	First	Second	3.45	1.7	Pelophylax_nigromaculatus	Pn_2022_89	126	25.65	1489	Ignore	Eat
54	2022-08-18	22:23:00		Paederus_fuscipes	Paederus_fuscipes_2022_8-18-2	12	Male	First	8.08	2.4	Pelophylax_nigromaculatus	Pn_2022_90	127	23.79	1012.8	Eat	-
55	2022-08-18	22:28:00	00:05:00	Sirthenea_flavipes	Sirthenea_flavipes_2022_15	57	Second	Second	5.69	4.7	Pelophylax_nigromaculatus	Pn_2022_90	127	23.79	1012.8	Stop_attack	Eat
56	2023-07-24	03:04:00		Paederus_fuscipes	Paederus_fuscipes_2023_1	15	Male	First	7.7	3	Pelophylax_nigromaculatus	Pn_2023_31	129	34.72	2678	Stop_attack	-
57	2023-07-24	03:10:00	00:06:00	Sirthenea_flavipes	Sirthenea_flavipes_L_2023_1	67	Third	Second	7.27	14.9	Pelophylax_nigromaculatus	Pn_2023_31	129	34.72	2678	Stop_attack	Eat
58	2023-07-24	03:30:00		Paederus_fuscipes	Paederus_fuscipes_2023_2	26	Female	First	7.06	2.8	Pelophylax_nigromaculatus	Pn_2023_30	128	33.82	2642.8	Eat	-
59	2023-07-24	03:36:00	00:06:00	Sirthenea_flavipes	Sirthenea_flavipes_L_2023_2	72	Third	Second	7.88	9.8	Pelophylax_nigromaculatus	Pn_2023_30	128	33.82	2642.8	Stop_attack	Eat
68	2023-08-02	00:04:00		Paederus_fuscipes	Paederus_fuscipes_2023_6	31	Female	First	8.26	4.2	Pelophylax_nigromaculatus	Pn_2023_34	132	35.52	3271.7	Eat	-
69	2023-08-02	00:10:00	00:06:00	Sirthenea_flavipes	Sirthenea_flavipes_L_2023_5	75	Second	Second	8.06	10.7	Pelophylax_nigromaculatus	Pn_2023_34	132	35.52	3271.7	Eat	-
70	2023-08-02	00:15:00		Paederus_fuscipes	Paederus_fuscipes_2023_7	32	Female	First	8.67	4.3	Pelophylax_nigromaculatus	Pn_2023_35	133	35.43	2781.8	Stop_attack	-
71	2023-08-02	00:21:00	00:06:00	Sirthenea_flavipes	Sirthenea_flavipes_L_2023_3	73	Third	Second	7.67	11.7	Pelophylax_nigromaculatus	Pn_2023_35	133	35.43	2781.8	Stop_attack	Eat
72	2023-08-02	01:33:00		Paederus_fuscipes	Paederus_fuscipes_2023_8	33	Female	First	8.44	4.6	Pelophylax_nigromaculatus	Pn_2023_45	138	33.02	2588.1	Eat	-
73	2023-08-02	01:39:00	00:06:00	Sirthenea_flavipes	Sirthenea_flavipes_L_2023_1	67	Third	Second	7.96	13	Pelophylax_nigromaculatus	Pn_2023_45	138	33.02	2588.1	Stop_attack	Eat
74	2023-08-02	01:50:00		Paederus_fuscipes	Paederus_fuscipes_2023_9	34	Female	First	8.92	4.1	Pelophylax_nigromaculatus	Pn_2023_46	139	30.73	1989.6	Ignore	-
75	2023-08-02	01:56:00	00:06:00	Sirthenea_flavipes	Sirthenea_flavipes_L_2023_2	72	Third	Second	7.2	7.8	Pelophylax_nigromaculatus	Pn_2023_46	139	30.73	1989.6	Ignore	Eat
76	2023-08-02	02:05:00		Paederus_fuscipes	Paederus_fuscipes_2023_10	16	Male	First	8.3	4.3	Pelophylax_nigromaculatus	Pn_2023_42	136	39.06	4629.3	Eat	-
77	2023-08-02	02:11:00	00:06:00	Sirthenea_flavipes	Sirthenea_flavipes_L_2023_2	72	Third	Second	8.16	12.2	Pelophylax_nigromaculatus	Pn_2023_42	136	39.06	4629.3	Eat	-
78	2023-08-02	02:17:00		Paederus_fuscipes	Paederus_fuscipes_2023_11	17	Male	First	7.95	3	Pelophylax_nigromaculatus	Pn_2023_41	135	38.24	3736.2	Ignore	-
79	2023-08-02	02:23:00	00:06:00	Sirthenea_flavipes	Sirthenea_flavipes_L_2023_1	67	Third	Second	8.56	13.2	Pelophylax_nigromaculatus	Pn_2023_41	135	38.24	3736.2	Ignore	Eat
84	2023-08-11	21:40:00		Paederus_fuscipes	Paederus_fuscipes_2023_14	20	Female	First	8.12	4.4	Pelophylax_nigromaculatus	Pn_2023_55	141	32.46	2405.5	Stop_attack	-
85	2023-08-11	21:47:00	00:07:00	Sirthenea_flavipes	Sirthenea_flavipes_L_2023_8	78	Second	Second	5.86	5.3	Pelophylax_nigromaculatus	Pn_2023_55	141	32.46	2405.5	Ignore	Eat
88	2023-08-11	22:24:00		Paederus_fuscipes	Paederus_fuscipes_2023_16	22	Female	First	8.55	5.5	Pelophylax_nigromaculatus	Pn_2023_57	143	39.42	4270.8	Stop_attack	-
89	2023-08-11	22:29:00	00:05:00	Sirthenea_flavipes	Sirthenea_flavipes_L_2023_10	68	Second	Second	5.6	4.4	Pelophylax_nigromaculatus	Pn_2023_57	143	39.42	4270.8	Ignore	Eat
94	2023-08-23	21:01:00		Paederus_fuscipes	Paederus_fuscipes_2023_19	25	Male	First	8.41	3.9	Pelophylax_nigromaculatus	Pn_2023_67	147	38.41	3910.5	Eat	-
95	2023-08-23	21:07:00	00:06:00	Sirthenea_flavipes	Sirthenea_flavipes_L_2023_7	77	Fourth	Second	9.83	23	Pelophylax_nigromaculatus	Pn_2023_67	147	38.41	3910.5	Eat	-
98	2023-08-23	21:30:00		Paederus_fuscipes	Paederus_fuscipes_2023_21	28	Female	First	8.58	4.1	Pelophylax_nigromaculatus	Pn_2023_65	145	41.81	5614.2	Stop_attack	-
99	2023-08-23	21:36:00	00:06:00	Sirthenea_flavipes	Sirthenea_flavipes_L_2023_13	71	Fourth	Second	8.65	18.8	Pelophylax_nigromaculatus	Pn_2023_65	145	41.81	5614.2	Stop_attack	Eat

## Sheet: Experiment_II_B
Code	Date	Time	Time_lag	Prey_species	Prey_code	Prey_code_number	Instar/sex	Order	Prey_length_mm	Prey_weight_mg	Predator_species	Predator_code	Predator_code_number	Predator_SVL_mm	Predator_weight_mg	Result	Mealworm_after_experiment
2	2022-08-07	08:08:00		Sirthenea_flavipes	Sirthenea_flavipes_2022_2	59	Second	First	5.78	4.6	Pelophylax_nigromaculatus	Pn_2022_68	105	22.72	1035.5	Stop_attack	-
3	2022-08-07	08:13:00	00:05:00	Paederus_fuscipes	Paederus_fuscipes_2022_8-7-1	13	Female	Second	7.96	3.3	Pelophylax_nigromaculatus	Pn_2022_68	105	22.72	1035.5	Stop_attack	Eat
4	2022-08-07	08:28:00		Sirthenea_flavipes	Sirthenea_flavipes_2022_3	60	Second	First	5.56	4.3	Pelophylax_nigromaculatus	Pn_2022_69	106	26.47	1312.8	Stop_attack	-
5	2022-08-07	08:34:00	00:06:00	Paederus_fuscipes	Paederus_fuscipes_2022_8-7-1	13	Female	Second	7.96	3.3	Pelophylax_nigromaculatus	Pn_2022_69	106	26.47	1312.8	Stop_attack	Eat
6	2022-08-07	08:41:00		Sirthenea_flavipes	Sirthenea_flavipes_2022_4	61	Third	First	7.28	9.8	Pelophylax_nigromaculatus	Pn_2022_62	102	33.34	3242.4	Eat	-
7	2022-08-07	08:48:00	00:07:00	Paederus_fuscipes	Paederus_fuscipes_2022_8-7-1	13	Female	Second	7.96	3.3	Pelophylax_nigromaculatus	Pn_2022_62	102	33.34	3242.4	Ignore	Eat
8	2022-08-07	08:55:00		Sirthenea_flavipes	Sirthenea_flavipes_2022_5	62	Second	First	5.52	4	Pelophylax_nigromaculatus	Pn_2022_70	107	33.53	3058.9	Stop_attack	-
9	2022-08-07	09:01:00	00:06:00	Paederus_fuscipes	Paederus_fuscipes_2022_8-7-1	13	Female	Second	7.96	3.3	Pelophylax_nigromaculatus	Pn_2022_70	107	33.53	3058.9	Ignore	Eat
10	2022-08-07	09:11:00		Sirthenea_flavipes	Sirthenea_flavipes_2022_6	63	Second	First	5.23	3	Pelophylax_nigromaculatus	Pn_2022_51	101	27.07	1283.5	Eat	-
11	2022-08-07	09:18:00	00:07:00	Paederus_fuscipes	Paederus_fuscipes_2022_8-7-1	13	Female	Second	7.96	3.3	Pelophylax_nigromaculatus	Pn_2022_51	101	27.07	1283.5	Ignore	Eat
12	2022-08-07	10:06:00		Sirthenea_flavipes	Sirthenea_flavipes_2022_7	64	Third	First	6.87	6.3	Pelophylax_nigromaculatus	Pn_2022_65	103	35.78	3081.6	Eat	-
13	2022-08-07	10:17:00	00:11:00	Paederus_fuscipes	Paederus_fuscipes_2022_8-7-1	13	Female	Second	7.96	3.3	Pelophylax_nigromaculatus	Pn_2022_65	103	35.78	3081.6	Ignore	Ignore
14	2022-08-07	10:25:00		Sirthenea_flavipes	Sirthenea_flavipes_2022_8	65	Second	First	5.42	4	Pelophylax_nigromaculatus	Pn_2022_71	108	23.91	1103.3	Stop_attack	-
15	2022-08-07	10:32:00	00:07:00	Paederus_fuscipes	Paederus_fuscipes_2022_8-7-1	13	Female	Second	7.96	3.3	Pelophylax_nigromaculatus	Pn_2022_71	108	23.91	1103.3	Ignore	Eat
16	2022-08-07	10:36:00		Sirthenea_flavipes	Sirthenea_flavipes_2022_9	66	Second	First	5.79	3.9	Pelophylax_nigromaculatus	Pn_2022_72	109	24.25	1128.3	Stop_attack	-
17	2022-08-07	10:42:00	00:06:00	Paederus_fuscipes	Paederus_fuscipes_2022_8-7-1	13	Female	Second	7.96	3.3	Pelophylax_nigromaculatus	Pn_2022_72	109	24.25	1128.3	Ignore	Eat
18	2022-08-07	10:49:00		Sirthenea_flavipes	Sirthenea_flavipes_2022_10	52	Second	First	5.87	3.3	Pelophylax_nigromaculatus	Pn_2022_73	110	31.31	2641.3	Stop_attack	-
19	2022-08-07	10:55:00	00:06:00	Paederus_fuscipes	Paederus_fuscipes_2022_8-7-1	13	Female	Second	7.96	3.3	Pelophylax_nigromaculatus	Pn_2022_73	110	31.31	2641.3	Ignore	Eat
20	2022-08-07	11:01:00		Sirthenea_flavipes	Sirthenea_flavipes_2022_11	53	Second	First	5.07	4	Pelophylax_nigromaculatus	Pn_2022_74	111	37.73	3815.3	Ignore	-
21	2022-08-07	11:07:00	00:06:00	Paederus_fuscipes	Paederus_fuscipes_2022_8-7-1	13	Female	Second	7.96	3.3	Pelophylax_nigromaculatus	Pn_2022_74	111	37.73	3815.3	Ignore	Eat
22	2022-08-07	11:14:00		Sirthenea_flavipes	Sirthenea_flavipes_2022_1	51	Third	First	7.22	9.4	Pelophylax_nigromaculatus	Pn_2022_75	112	25.28	984.4	Eat	-
23	2022-08-07	11:20:00	00:06:00	Paederus_fuscipes	Paederus_fuscipes_2022_8-7-1	13	Female	Second	7.96	3.3	Pelophylax_nigromaculatus	Pn_2022_75	112	25.28	984.4	Eat	-
24	2022-08-07	11:24:00		Sirthenea_flavipes	Sirthenea_flavipes_2022_12	54	Second	First	5.07	5.8	Pelophylax_nigromaculatus	Pn_2022_76	113	24.29	1038.8	Stop_attack	-
25	2022-08-07	11:30:00	00:06:00	Paederus_fuscipes	Paederus_fuscipes_2022_8-7-2	14	Male	Second	8.12	3.5	Pelophylax_nigromaculatus	Pn_2022_76	113	24.29	1038.8	Stop_attack	Eat
26	2022-08-07	11:44:00		Sirthenea_flavipes	Sirthenea_flavipes_2022_13	55	Second	First	5.56	3.6	Pelophylax_nigromaculatus	Pn_2022_77	114	30.57	2177.4	Ignore	-
27	2022-08-07	11:50:00	00:06:00	Paederus_fuscipes	Paederus_fuscipes_2022_8-7-2	14	Male	Second	8.12	3.5	Pelophylax_nigromaculatus	Pn_2022_77	114	30.57	2177.4	Stop_attack	Eat
28	2022-08-07	11:57:00		Sirthenea_flavipes	Sirthenea_flavipes_2022_14	56	Second	First	5.88	4.3	Pelophylax_nigromaculatus	Pn_2022_78	115	36.8	2970.4	Stop_attack	-
29	2022-08-07	12:03:00	00:06:00	Paederus_fuscipes	Paederus_fuscipes_2022_8-7-2	14	Male	Second	8.12	3.5	Pelophylax_nigromaculatus	Pn_2022_78	115	36.8	2970.4	Ignore	Eat
30	2022-08-07	12:11:00		Sirthenea_flavipes	Sirthenea_flavipes_2022_15	57	Second	First	5.97	5.6	Pelophylax_nigromaculatus	Pn_2022_79	116	26.46	1333.8	Stop_attack	-
31	2022-08-07	12:18:00	00:07:00	Paederus_fuscipes	Paederus_fuscipes_2022_8-7-2	14	Male	Second	8.12	3.5	Pelophylax_nigromaculatus	Pn_2022_79	116	26.46	1333.8	Ignore	Eat
60	2023-07-24	03:42:00		Sirthenea_flavipes	Sirthenea_flavipes_L_2023_3	73	Third	First	7.7	12.8	Pelophylax_nigromaculatus	Pn_2023_32	130	28.53	1659.1	Stop_attack	-
61	2023-07-24	03:48:00	00:06:00	Paederus_fuscipes	Paederus_fuscipes_2023_1	15	Male	Second	7.7	3	Pelophylax_nigromaculatus	Pn_2023_32	130	28.53	1659.1	Eat	-
64	2023-08-01	23:20:00		Sirthenea_flavipes	Sirthenea_flavipes_L_2023_5	75	Second	First	8.06	10.7	Pelophylax_nigromaculatus	Pn_2023_44	137	34.82	3518.9	Stop_attack	-
65	2023-08-01	23:26:00	00:06:00	Paederus_fuscipes	Paederus_fuscipes_2023_4	30	Female	Second	8.21	4.1	Pelophylax_nigromaculatus	Pn_2023_44	137	34.82	3518.9	Ignore	Eat
66	2023-08-01	23:36:00		Sirthenea_flavipes	Sirthenea_flavipes_L_2023_4	74	Second	First	8.09	10.6	Pelophylax_nigromaculatus	Pn_2023_36	134	38.15	4188.8	Eat	-
67	2023-08-01	23:42:00	00:06:00	Paederus_fuscipes	Paederus_fuscipes_2023_3	29	Male	Second	7.69	3.6	Pelophylax_nigromaculatus	Pn_2023_36	134	38.15	4188.8	Eat	-
80	2023-08-02	02:35:00		Sirthenea_flavipes	Sirthenea_flavipes_L_2023_6	76	Fourth	First	9.52	23.2	Pelophylax_nigromaculatus	Pn_2023_33	131	36.04	3217	Stop_attack	-
81	2023-08-02	02:41:00	00:06:00	Paederus_fuscipes	Paederus_fuscipes_2023_12	18	Male	Second	7.46	3.7	Pelophylax_nigromaculatus	Pn_2023_33	131	36.04	3217	Eat	-
82	2023-08-02	02:51:00		Sirthenea_flavipes	Sirthenea_flavipes_L_2023_7	77	Fourth	First	8.94	25.1	Pelophylax_nigromaculatus	Pn_2023_47	140	35.13	3228.6	Stop_attack	-
83	2023-08-02	02:57:00	00:06:00	Paederus_fuscipes	Paederus_fuscipes_2023_13	19	Male	Second	7.39	2.5	Pelophylax_nigromaculatus	Pn_2023_47	140	35.13	3228.6	Eat	-
86	2023-08-11	22:09:00		Sirthenea_flavipes	Sirthenea_flavipes_L_2023_9	79	Second	First	7.53	10.6	Pelophylax_nigromaculatus	Pn_2023_56	142	37.4	4003.1	Eat	-
87	2023-08-11	22:15:00	00:06:00	Paederus_fuscipes	Paederus_fuscipes_2023_15	21	Male	Second	7.85	3.6	Pelophylax_nigromaculatus	Pn_2023_56	142	37.4	4003.1	Stop_attack	Eat
90	2023-08-11	22:36:00		Sirthenea_flavipes	Sirthenea_flavipes_L_2023_11	69	Second	First	7.04	12.7	Pelophylax_nigromaculatus	Pn_2023_58	144	35.36	3276.1	Stop_attack	-
91	2023-08-11	22:42:00	00:06:00	Paederus_fuscipes	Paederus_fuscipes_2023_17	23	Male	Second	7.72	3.1	Pelophylax_nigromaculatus	Pn_2023_58	144	35.36	3276.1	Ignore	Eat
92	2023-08-23	20:46:00		Sirthenea_flavipes	Sirthenea_flavipes_L_2023_12	70	Fourth	First	9.92	25.3	Pelophylax_nigromaculatus	Pn_2023_66	146	34.18	3205.7	Eat	-
93	2023-08-23	20:52:00	00:06:00	Paederus_fuscipes	Paederus_fuscipes_2023_18	24	Male	Second	8.32	4.6	Pelophylax_nigromaculatus	Pn_2023_66	146	34.18	3205.7	Ignore	Eat
96	2023-08-23	21:13:00		Sirthenea_flavipes	Sirthenea_flavipes_L_2023_13	71	Fourth	First	8.65	18.8	Pelophylax_nigromaculatus	Pn_2023_68	148	42	5641.4	Stop_attack	-
97	2023-08-23	21:19:00	00:06:00	Paederus_fuscipes	Paederus_fuscipes_2023_20	27	Female	Second	8.26	4.2	Pelophylax_nigromaculatus	Pn_2023_68	148	42	5641.4	Ignore	Eat
